# Supplementary material for: Aloe polysaccharides ameliorate obesity-associated cognitive dysfunction in high-fat diet-fed mice by targeting the gut microbiota and intestinal barrier integrity
Source: Royal Society of Chemistry journal article supplement (doi:10.1039/d4fo01844c), 2024-01-01
Supplement: d4fo01844c1.pdf [file d4fo01844c1.pdf]

Supplementary document

Table S1 Effects of APs on body weight and food take in mice

|                         | CT           | HF               | CT-AP           | HF-AP          |
|-------------------------|--------------|------------------|-----------------|----------------|
| Initial body weight (g) | 16.62 ± 1.37 | 15.46 ± 0.96     | 15.80 ± 0.86    | 16.61 ± 1.26   |
| Final body weight (g)   | 32.83 ± 2.91 | 36.50 ± 2.02 **  | 32.35 ± 2.34 ## | 34.40 ± 1.44 # |
| Body weight gain (g)    | 16.21 ± 2.96 | 21.04 ± 2.59 *** | 16.55 ± 2.00 ## | 17.79 ± 1.69 # |
| Food intake (g/day)     | 3.11 ± 0.16  | 2.95 ± 0.22      | 3.15 ± 0.18     | 3.01 ± 0.18    |

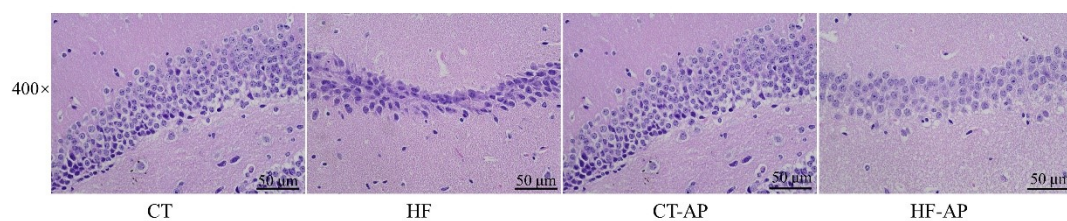

Figure S1 Effects of APs on the pathology in the brain tissues.
